# Supplementary material
Source: PubMed Central journal article supplement (PMC11494164)
Supplement: JZhejiangUnivSciB-25-10-857-s001.pdf [file JZhejiangUnivSciB-25-10-857-s001.pdf]

## Supplementary Materials

### Supplementary Tables

**Table S1 Thalamic nuclei groups used for analysis**

| Group    | Nucleus                           |
|----------|-----------------------------------|
| Anterior | Anteroventral                     |
| Lateral  | Laterodorsal                      |
|          | Lateral posterior                 |
| Ventral  | Ventral anterior                  |
|          | Ventral anterior magnocellular    |
|          | Ventral lateral anterior          |
|          | Ventral lateral posterior         |
|          | Ventral posterolateral            |
|          | Ventromedial                      |
| ILM      | Central medial                    |
|          | Central lateral                   |
|          | Paracentral                       |
|          | Centromedian                      |
|          | Parafascicular                    |
|          | Paratenial                        |
|          | Reuniens (medial ventral)         |
|          | Mediodorsal medial magnocellular  |
|          | Mediodorsal lateral parvocellular |
| Pulvinar | Pulvinar anterior                 |
|          | Pulvinar medial                   |
|          | Pulvinar lateral                  |
|          | Pulvinar inferior                 |

Anterior: anterior thalamus; Lateral: lateral thalamus; Ventral: ventral thalamus; ILM: intralaminar/medial thalamus; Pulvinar: pulvinar thalamus.

**Table S2 Correspondence of thalamocortical FC patterns in 10 thalamic subregions between smoothing kernels of 6 and 8 mm**

| Thalamic subregion | <i>r</i> | <i>P</i> |
|--------------------|----------|----------|
| LH_Anterior        | 0.992    | <0.001   |
| RH_Anterior        | 0.992    | <0.001   |
| LH_ILM             | 0.998    | <0.001   |
| RH_ILM             | 0.999    | <0.001   |
| LH_Lateral         | 0.972    | <0.001   |
| RH_Lateral         | 0.973    | <0.001   |
| LH_Pulvinar        | 0.997    | <0.001   |
| RH_Pulvinar        | 0.997    | <0.001   |
| LH_Ventral         | 0.999    | <0.001   |
| RH_Ventral         | 0.999    | <0.001   |

*r* and *P* values were obtained via the Pearson's correlation analysis. Results were corrected via the FDR method at the level of  $q=0.05$ . FDR: false discovery rate; LH: left hemisphere; RH: right hemisphere; Anterior: anterior thalamus; ILM: intralaminar/medial thalamus; Lateral: lateral thalamus; Pulvinar: pulvinar thalamus; Ventral: ventral thalamus.

**Table S3 Results of four temporal properties in the sliding window analysis**

| Temporal property      | State              | HCs ( <i>n</i> =57) | MDD ( <i>n</i> =48) | <i>P</i> |
|------------------------|--------------------|---------------------|---------------------|----------|
| Mean dwell time        | State 1            | 22.940±40.251       | 13.524±31.332       | 0.517    |
|                        | State 2            | 15.761±26.070       | 15.776±33.396       | 0.916    |
|                        | State 3            | 22.332±23.017       | 23.387±27.022       | 0.916    |
|                        | State 4            | 22.763±23.957       | 28.025±23.569       | 0.517    |
| Fraction time          | State 1            | 0.216±0.290         | 0.102±0.203         | 0.102    |
|                        | State 2            | 0.156±0.256         | 0.138±0.231         | 0.699    |
|                        | State 3            | 0.278±0.198         | 0.343±0.255         | 0.278    |
|                        | State 4            | 0.350±0.263         | 0.417±0.286         | 0.299    |
| Number of transitions  |                    | 6.771±3.541         | 6.229±3.164         | 0.425    |
| Transition probability | State 1 to state 1 | 0.960±0.078         | 0.950±0.087         | 0.941    |
|                        | State 2 to state 1 | 0                   | 0                   | -        |
|                        | State 3 to state 1 | 0.001±0.009         | 0                   | -        |
|                        | State 4 to state 1 | 0.021±0.032         | 0.008±0.011         | 0.079    |
|                        | State 1 to state 2 | 0                   | 0                   | -        |
|                        | State 2 to state 2 | 0.957±0.150         | 0.959±0.146         | 0.941    |
|                        | State 3 to state 2 | 0.016±0.033         | 0.012±0.018         | 0.941    |
|                        | State 4 to state 2 | 0                   | 0                   | -        |
|                        | State 1 to state 3 | 0.001±0.003         | 0                   | -        |
|                        | State 2 to state 3 | 0.043±0.146         | 0.041±0.146         | 0.941    |
|                        | State 3 to state 3 | 0.944±0.056         | 0.945±0.068         | 0.941    |
|                        | State 4 to state 3 | 0.050±0.136         | 0.051±0.146         | 0.941    |
|                        | State 1 to state 4 | 0.039±0.078         | 0.050±0.087         | 0.941    |
|                        | State 2 to state 4 | 0                   | 0                   | -        |
|                        | State 3 to state 4 | 0.038±0.052         | 0.043±0.068         | 0.941    |
|                        | State 4 to state 4 | 0.929±0.135         | 0.0941±0.144        | 0.941    |

Data were displayed as mean±standard deviation (SD). *P* value was obtained using the two-sample *t*-test. Results were corrected via the FDR method at the level of  $q=0.05$ . FDR: false discovery rate; HCs: healthy controls; MDD: major depressive disorder.

## Supplementary Figures

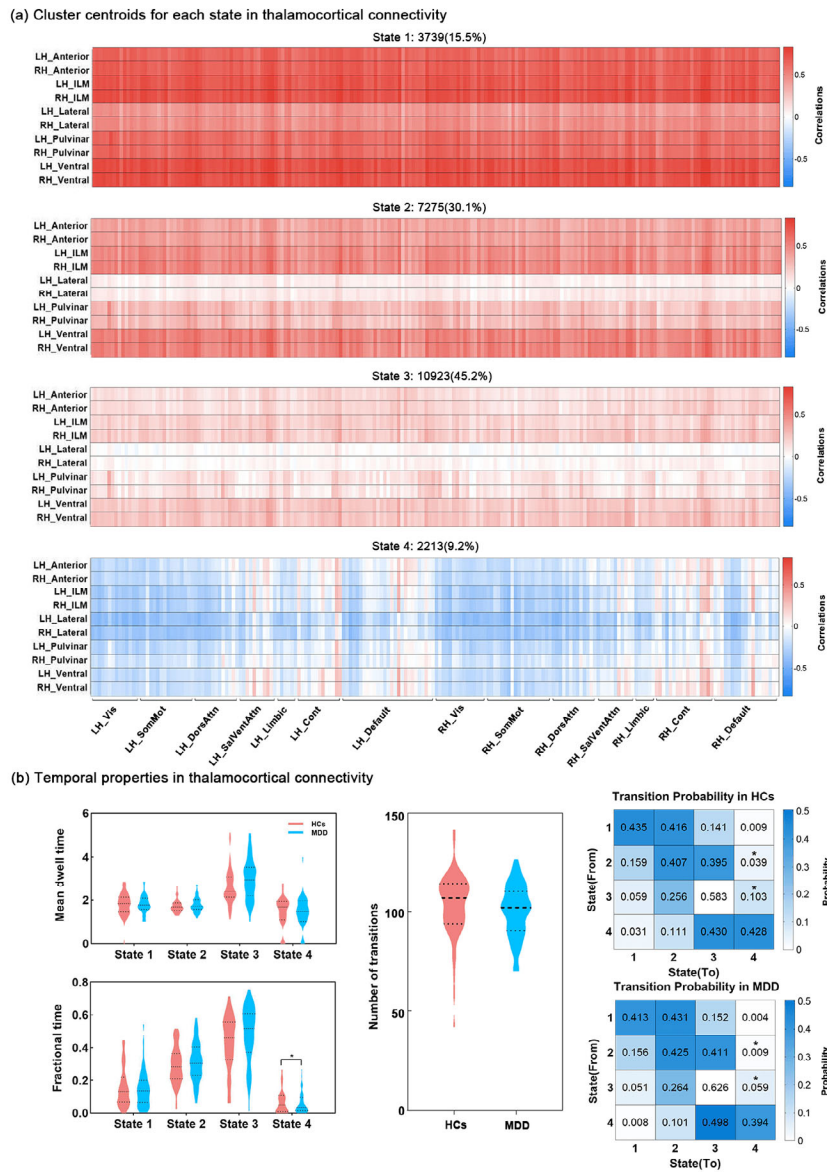

**Fig. S1 Results of temporal properties in thalamocortical connectivity. (a) Cluster centroids for each state in thalamocortical connectivity. The total number and percentage of state occurrences are listed above each centroid. (b) Temporal properties of thalamocortical dFC states. Asterisks represent significant between-group differences at  $P_{FDR}<0.05$ . dFC: dynamic functional connectivity; FDR: false discovery rate; LH: left hemisphere; RH: right hemisphere; Anterior: anterior thalamus; ILM: intralaminar/medial thalamus; Lateral: lateral thalamus; Pulvinar: pulvinar thalamus; Ventral: ventral thalamus; Vis: visual network; SomMot: somatomotor network; DorsAttn: dorsal attention network; SalVentAttn: salient ventral attention network; Limbic: limbic network; Cont: executive control network; Default: default mode network; HCs: healthy controls; MDD: major depressive disorder.**

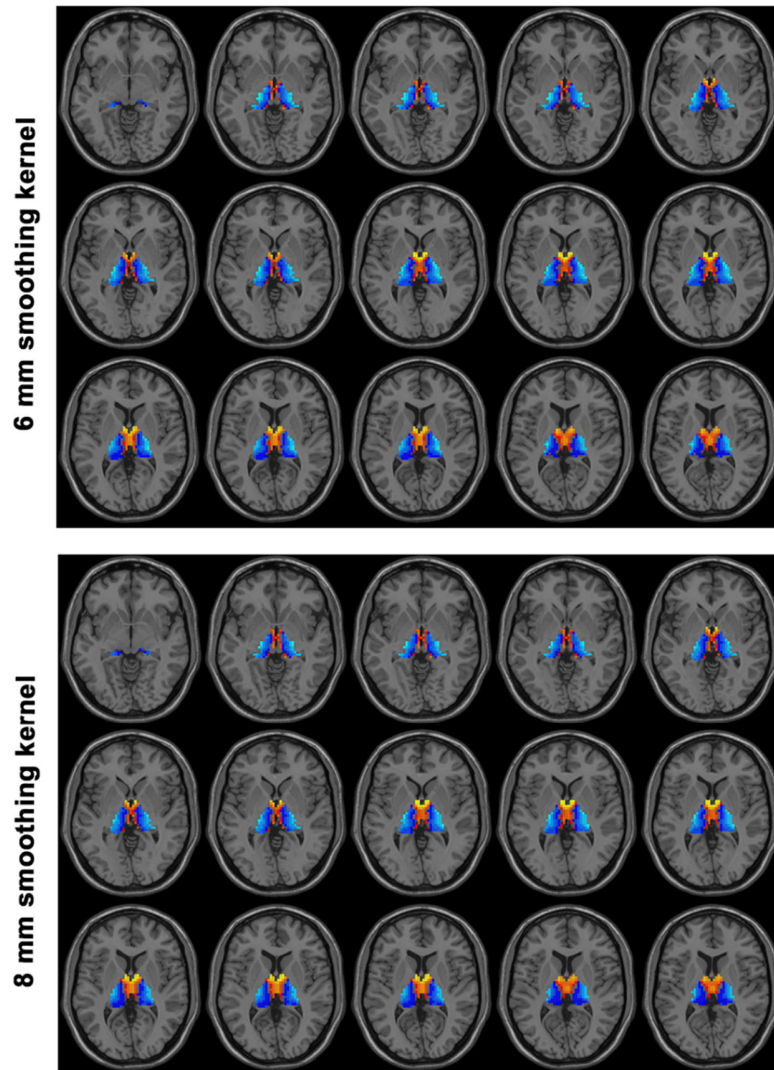

Fig. S2 Results of one sample  $t$ -test of the amplitude of low-frequency fluctuation (ALFF) in 6 and 8 mm smoothing kernels. The significant threshold was set to  $P < 0.001$  at the voxel level (one-sample  $t$ -test), followed by Gaussian random field correction at the cluster level of  $P < 0.05$ .

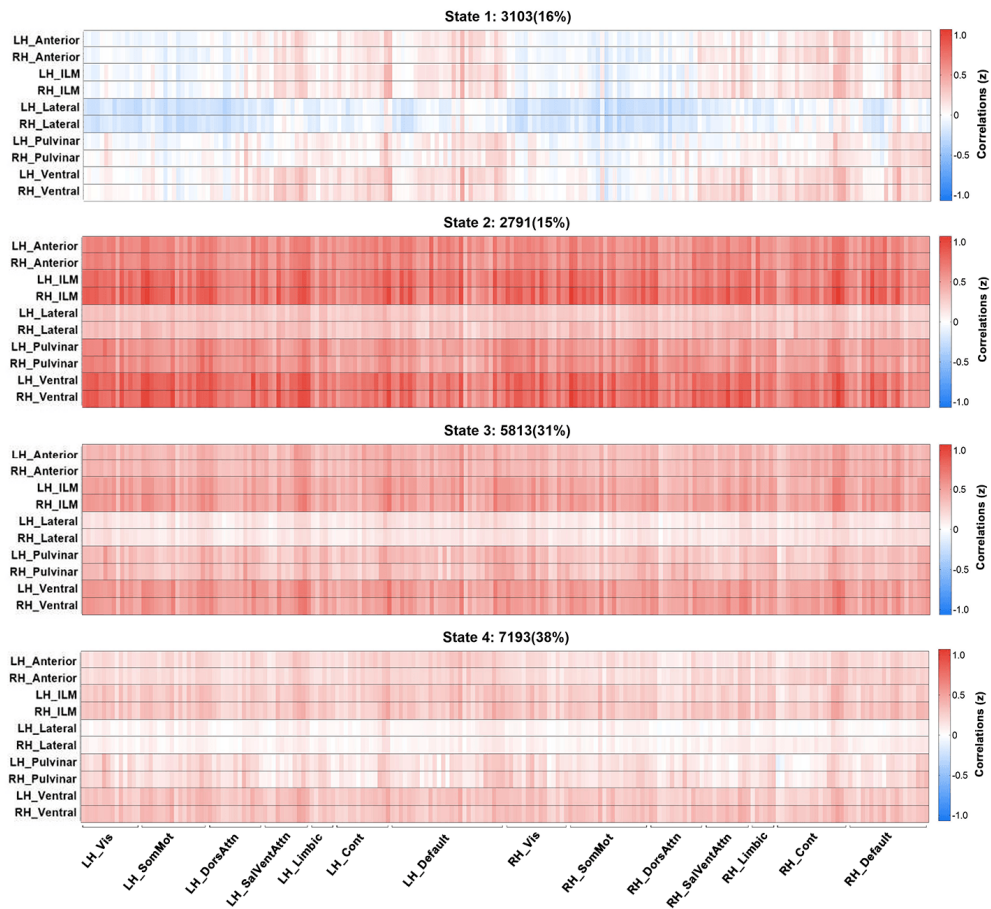

**Fig. S3 Cluster centroids for each state in thalamocortical connectivity in the sliding window analysis. The total number and percentage of state occurrences are listed above each centroid. LH: left hemisphere; RH: right hemisphere; Anterior: anterior thalamus; ILM: intralaminar/medial thalamus; Lateral: lateral thalamus; Pulvinar: pulvinar thalamus; Ventral: ventral thalamus; Vis: visual network; SomMot: somatomotor network; DorsAttn: dorsal attention network; SalVentAttn: salient ventral attention network; Limbic: limbic network; Cont: executive control network; Default: default mode network.**

(a) Cluster centroids for each state in thalamo-Vis connectivity

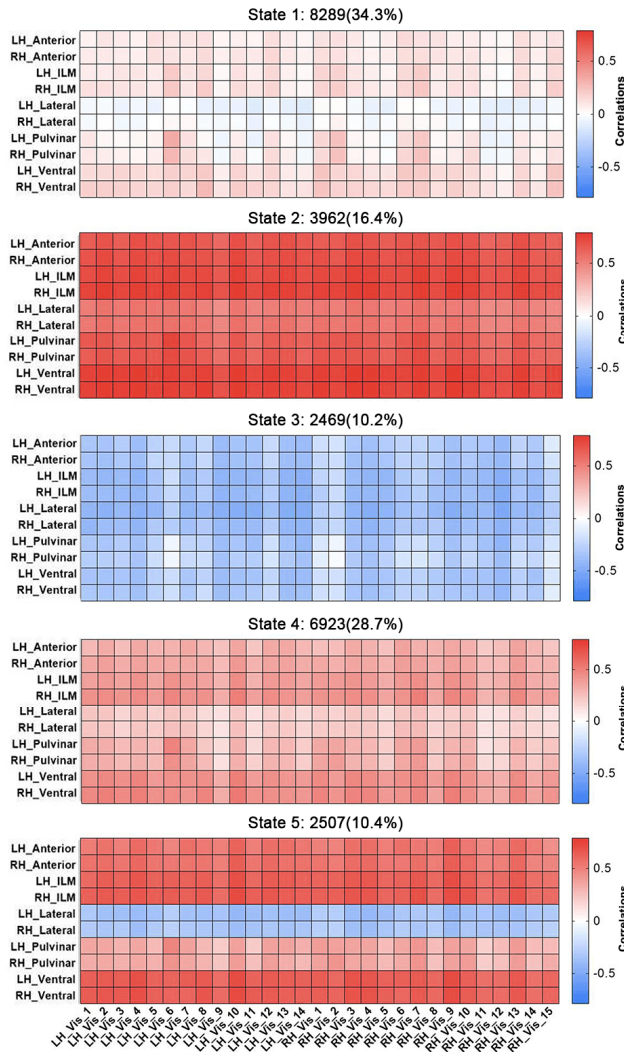

(b) Temporal properties in thalamo-Vis connectivity

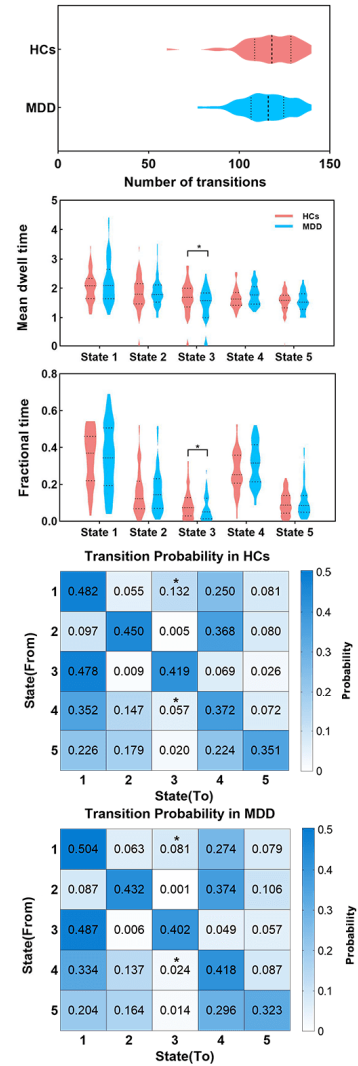

**Fig. S4 Results of temporal properties in thalamo-Vis connectivity. (a) Cluster centroids for each state in thalamo-Vis connectivity. The total number and percentage of state occurrences are listed above each centroid. (b) Temporal properties of dFC states in thalamo-Vis connectivity. Asterisks indicate significant between-group differences at  $P_{FDR}<0.05$ . dFC: dynamic functional connectivity; FDR: false discovery rate; LH: left hemisphere; RH: right hemisphere; Anterior: anterior thalamus; ILM: intralaminar/medial thalamus; Lateral: lateral thalamus; Pulvinar: pulvinar thalamus; Ventral: ventral thalamus; Vis: visual network; Vis\_[i]: the  $i$ th region of the visual network; HCs: healthy controls; MDD: major depressive disorder.**

(a) Cluster centroids for each state in thalamo-SomMot connectivity

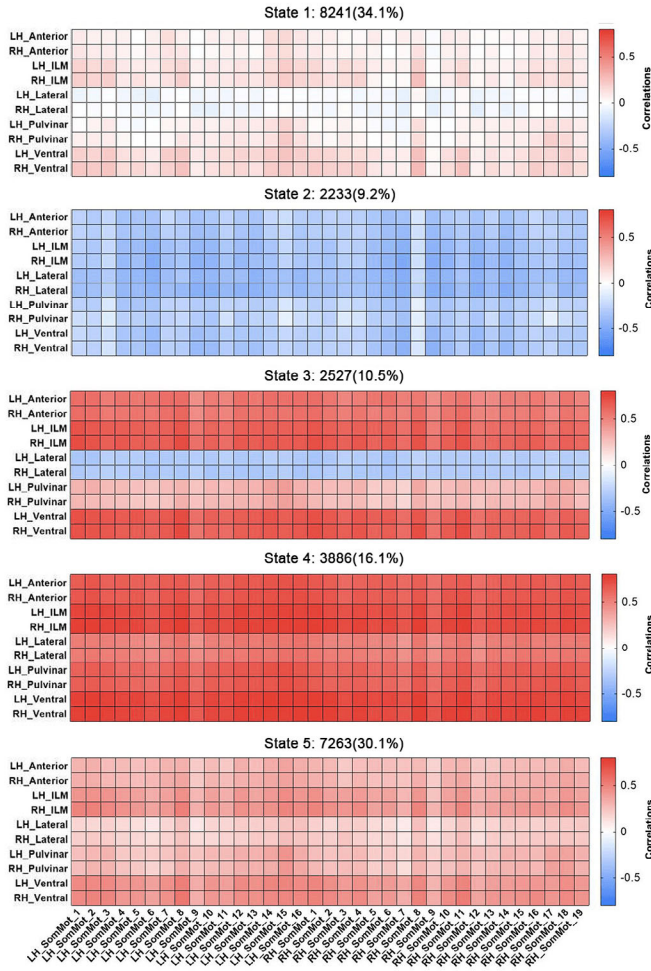

(b) Temporal properties in thalamo-SomMot connectivity

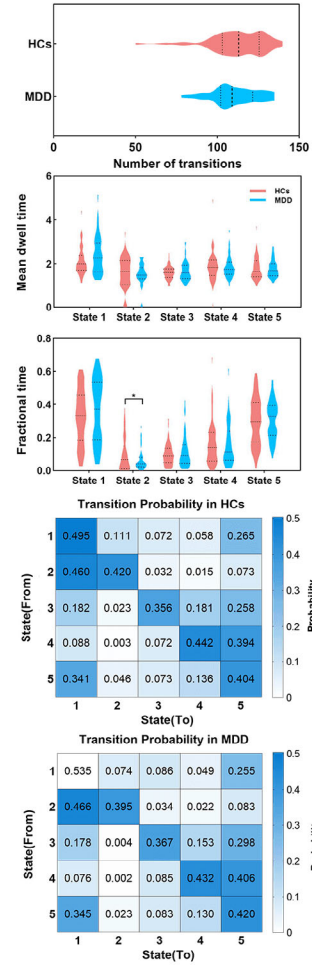

**Fig. S5 Results of temporal properties in thalamo-SomMot connectivity. (a) Cluster centroids for each state in thalamo-SomMot connectivity. The total number and percentage of state occurrences are listed above each centroid. (b) Temporal properties of dFC states in thalamo-SomMot connectivity. Asterisks indicate significant between-group differences at  $P_{FDR} < 0.05$ . dFC: dynamic functional connectivity; FDR: false discovery rate; LH: left hemisphere; RH: right hemisphere; Anterior: anterior thalamus; ILM: intralaminar/medial thalamus; Lateral: lateral thalamus; Pulvinar: pulvinar thalamus; Ventral: ventral thalamus; SomMot: somatomotor network; SomMot\_ $[i]$ : the  $i$ th region of the somatomotor network; HCs: healthy controls; MDD: major depressive disorder.**



(a) Cluster centroids for each state in thalamo-Limbic connectivity

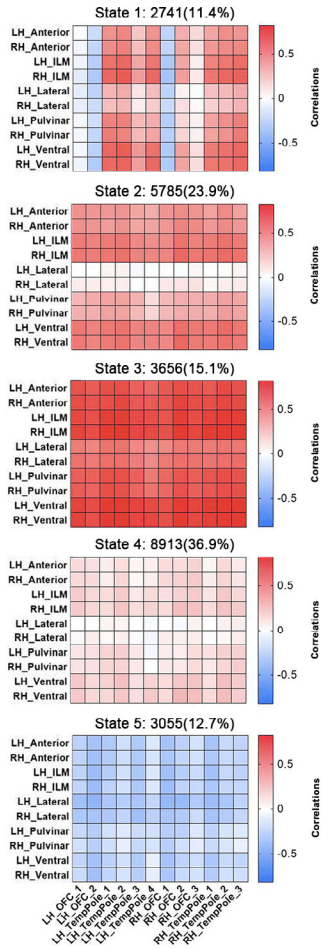

(b) Cluster centroids for each state in thalamo-Cont connectivity

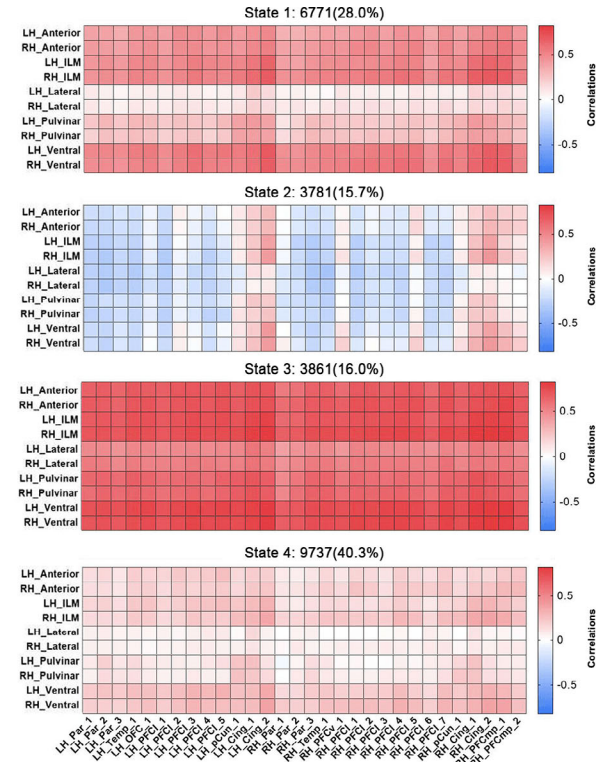

**Fig. S6 Cluster centroids for each state in thalamo-Limbic connectivity (a) and thalamo-Cont connectivity (b). The total number and percentage of state occurrences are listed above each centroid. LH: left hemisphere; RH: right hemisphere; Anterior: anterior thalamus; ILM: intralaminar/medial thalamus; Lateral: lateral thalamus; Pulvinar: pulvinar thalamus; Ventral: ventral thalamus; Limbic: limbic network; Cont: executive control network; OFC\_ $i$ ): the  $i$ th region of the orbital frontal cortex; TempPole\_ $i$ ): the  $i$ th region of the temporal pole; Par\_ $i$ ): the  $i$ th region of the parietal cortex; Temp\_ $i$ ): the  $i$ th region of the temporal cortex; PFCI\_ $i$ ): the  $i$ th region of the lateral prefrontal cortex; pCun\_ $i$ ): the  $i$ th region of the precuneus; Cing\_ $i$ ): the  $i$ th region of the cingulate; PFCv\_ $i$ ): the  $i$ th region of the ventral prefrontal cortex; PFCmp\_ $i$ ): the  $i$ th region of the medial posterior prefrontal cortex.**

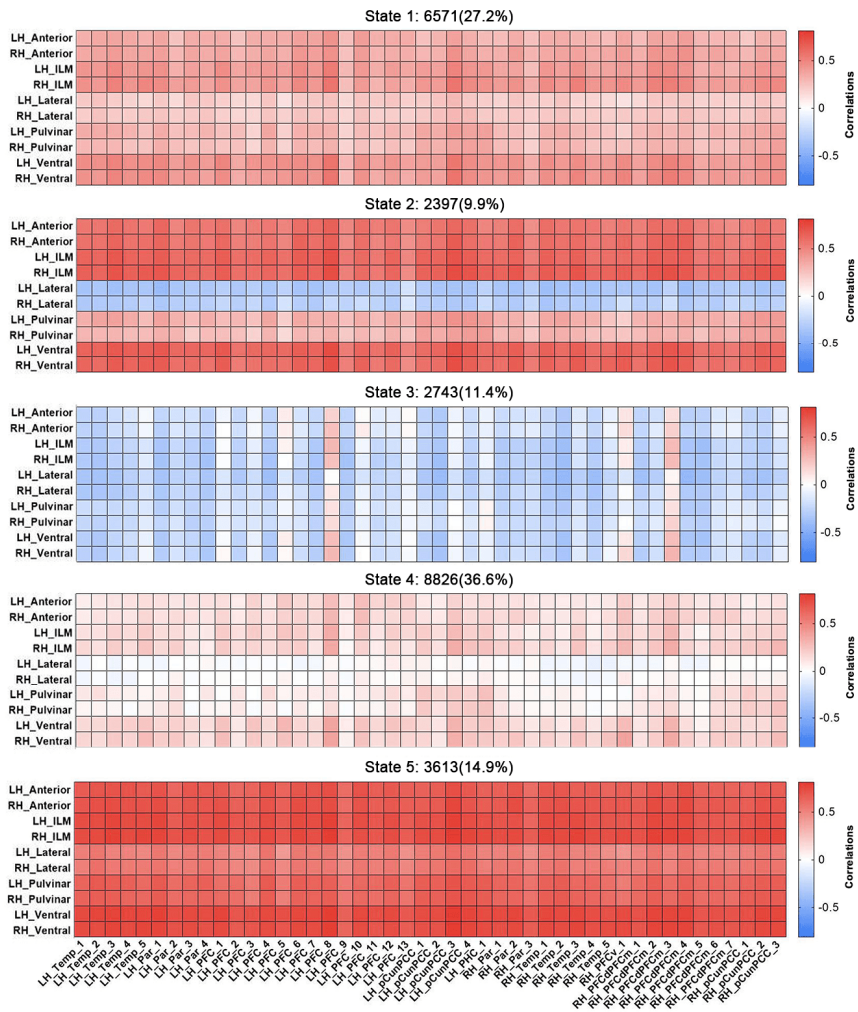

**Fig. S7 Cluster centroids for each state in thalamo-Default connectivity. The total number and percentage of state occurrences are listed above each centroid. LH: left hemisphere; RH: right hemisphere; Anterior: anterior thalamus; ILM: intralaminar/medial thalamus; Lateral: lateral thalamus; Pulvinar: pulvinar thalamus; Ventral: ventral thalamus; Default: default mode network; Par\_ $i$ ): the  $i$ th region of the parietal cortex; Temp\_ $i$ ): the  $i$ th region of the temporal cortex; PFC\_ $i$ ): the  $i$ th region of the prefrontal cortex; pCunPCC\_ $i$ ): the  $i$ th region of the precuneus/posterior cingulate; PHC\_ $i$ ): the  $i$ th region of the parahippocampal; PFCv\_ $i$ ): the  $i$ th region of the ventral prefrontal cortex; PFCdPFCm\_ $i$ ): the  $i$ th region of the dorsal/medial prefrontal cortex.**

(a) Cluster centroids for each state in thalamo-DorsAttn connectivity

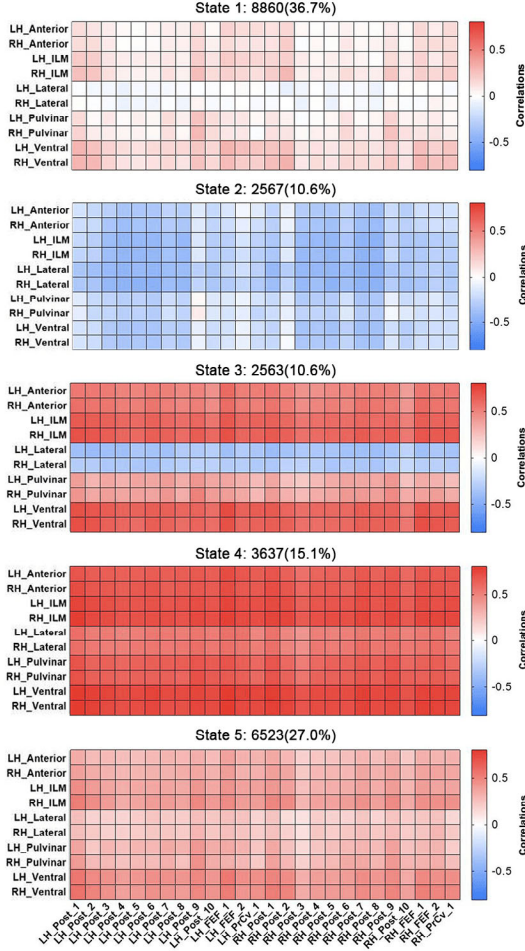

(b) Cluster centroids for each state in thalamo-SalVentAttn connectivity

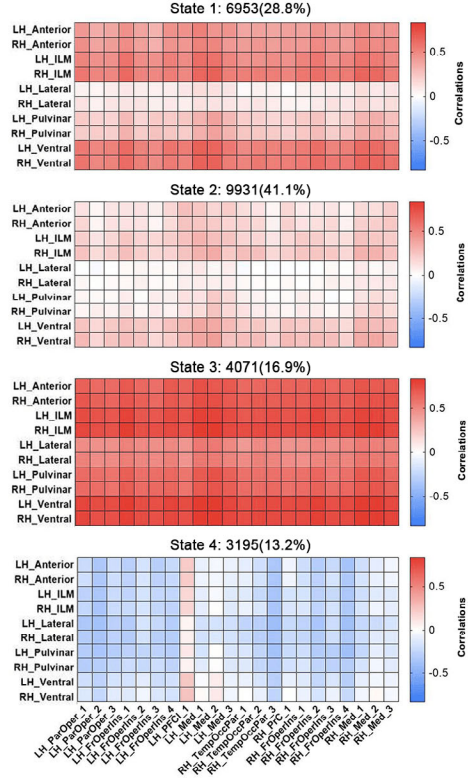

**Fig. S8 Cluster centroids for each state in thalamo-DorsAttn connectivity (a) and thalamo-SalVentAttn connectivity (b). The total number and percentage of state occurrences are listed above each centroid. LH: left hemisphere; RH: right hemisphere; Anterior: anterior thalamus; ILM: intralaminar/medial thalamus; Lateral: lateral thalamus; Pulvinar: pulvinar thalamus; Ventral: ventral thalamus; DorsAttn: dorsal attention network; SalVentAttn: salient ventral attention network; Post [*i*]: the *i*th region of the posterior cortex; FEF [*i*]: the *i*th region of the frontal eye fields; PrCv [*i*]: the *i*th region of the precentral ventral gyrus; ParOper [*i*]: the *i*th region of the parietal operculum; FrOperIns [*i*]: the *i*th region of the frontal operculum insula; PFCI [*i*]: the *i*th region of the lateral prefrontal cortex; Med [*i*]: the *i*th region of the medial cortex; Prc [*i*]: the *i*th region of the precentral gyrus.**
